# Supplementary material for: LRP5, SLC6A3, and SOX10 Expression in Conventional Ameloblastoma
Source: MDPI journal article supplement (doi:10.3390/genes14081524), 2023-07-26
Supplement: s1 [file s1]

**Supplementary table 1. List of P value and Log Fold Changes of ameloblastoma profile genes**

| <b>Symbol</b> | <b>PValue</b> | <b>logFC</b> |
|---------------|---------------|--------------|
| OBP2A         | 2.36E-18      | -2.9893191   |
| LGALS4        | 2.92E-18      | -2.9347697   |
| NT5M          | 5.66E-19      | -2.8690479   |
| LILRB1        | 9.69E-18      | -2.7996894   |
| FLJ20343      | 1.03E-17      | -2.7255629   |
| DNAH9         | 5.93E-18      | -2.7078208   |
| EIF4ENIF1     | 2.62E-18      | -2.6816422   |
| IFNA8         | 3.41E-18      | -2.6701346   |
| FLJ10587      | 5.43E-18      | -2.6563194   |
| ASRGL1        | 3.50E-18      | -2.5959203   |
| ATP5H         | 1.72E-17      | -2.5653845   |
| PIGL          | 1.07E-17      | -2.5191319   |
| CBLC          | 1.27E-17      | -2.489802    |
| MX2           | 1.92E-17      | -2.4737391   |
| JK            | 1.02E-17      | -2.4533314   |
| EPN3          | 2.97E-18      | -2.4532638   |
| SRP14         | 4.86E-17      | -2.4521452   |
| HIST1H1E      | 1.53E-17      | -2.4358077   |
| RAI           | 1.42E-17      | -2.4047196   |
| FLJ20530      | 1.33E-17      | -2.395883    |
| RPL29         | 9.56E-18      | -2.3938102   |
| HLF           | 1.38E-16      | -2.3855171   |
| MICA          | 1.18E-17      | -2.3849491   |

|          |          |            |
|----------|----------|------------|
| SUCLA2   | 1.91E-17 | -2.3845861 |
| PHF11    | 3.99E-17 | -2.3675199 |
| MRPL39   | 1.56E-16 | -2.362284  |
| SEC10L1  | 2.20E-18 | -2.3483933 |
| FLJ20045 | 2.40E-17 | -2.3292114 |
| PTK9     | 1.73E-17 | -2.3249519 |
| NRG1     | 6.94E-18 | -2.3076019 |
| PTPRO    | 8.12E-18 | -2.2907231 |
| CTSB     | 6.03E-17 | -2.2802467 |
| PHF3     | 1.45E-17 | -2.2793134 |
| FABP5    | 2.60E-17 | -2.2790737 |
| DUSP3    | 9.70E-18 | -2.2738341 |
| PSTPIP2  | 1.69E-17 | -2.2686714 |
| TADA2L   | 7.34E-17 | -2.2545662 |
| HPS5     | 8.56E-18 | -2.2482819 |
| RPL37    | 3.39E-17 | -2.1453696 |
| DNMT3A   | 1.73E-17 | -2.1227859 |
| TMEM14B  | 3.95E-18 | -2.0924561 |
| CAS1     | 1.83E-16 | -2.0695977 |
| SYT5     | 3.89E-17 | -2.064543  |
| MC4R     | 1.62E-17 | -2.0637994 |
| YWHAZ    | 2.67E-17 | -2.0461605 |
| SLC14A1  | 6.06E-17 | -2.0459744 |
| GLE1L    | 6.33E-16 | -2.0364516 |
| SUPT16H  | 5.62E-17 | -2.0257353 |
| BTN2A2   | 4.11E-16 | -2.0254121 |
| ZNF180   | 2.94E-16 | -2.0216184 |

|         |          |            |
|---------|----------|------------|
| SAP18   | 6.04E-16 | 2.00329808 |
| SFXN1   | 5.52E-17 | 2.00574822 |
| CEPT1   | 1.45E-15 | 2.01052054 |
| CLCN6   | 4.01E-17 | 2.01256685 |
| ZNF195  | 1.54E-16 | 2.02032268 |
| AK2     | 6.01E-17 | 2.02379827 |
| MGC3169 | 2.61E-17 | 2.03019288 |
| NTSR1   | 9.54E-17 | 2.0404398  |
| PSMB2   | 1.49E-16 | 2.04344903 |
| TAS2R13 | 1.17E-16 | 2.04834847 |
| PPHLN1  | 5.37E-17 | 2.05241771 |
| RCP     | 8.83E-17 | 2.05429376 |
| HRPT2   | 8.32E-17 | 2.05530649 |
| B3GAT3  | 1.35E-16 | 2.06038305 |
| KRTHA7  | 6.90E-17 | 2.06320633 |
| MTA2    | 8.55E-17 | 2.06546133 |
| MYO5C   | 3.18E-16 | 2.07345118 |
| STK25   | 1.02E-16 | 2.0753425  |
| CTAGE1  | 5.51E-16 | 2.07634974 |
| C7      | 1.98E-17 | 2.07707622 |
| GTF3C2  | 3.43E-17 | 2.08051663 |
| TAS2R1  | 4.54E-17 | 2.09188739 |
| UPF3A   | 3.77E-17 | 2.09271133 |
| QPCT    | 2.11E-17 | 2.09502399 |
| DKKL1   | 1.57E-16 | 2.09879532 |
| DRD3    | 5.50E-17 | 2.10028558 |
| ELF4    | 6.78E-17 | 2.1070931  |

|          |          |            |
|----------|----------|------------|
| KCNJ4    | 4.50E-16 | 2.10780242 |
| PDZK2    | 5.97E-17 | 2.11016307 |
| USP36    | 3.03E-17 | 2.11017679 |
| WDR4     | 4.05E-17 | 2.110357   |
| PLXNC1   | 8.64E-17 | 2.11438653 |
| COP1     | 2.24E-16 | 2.11468418 |
| FLRT1    | 6.16E-17 | 2.12137752 |
| HMG20B   | 5.31E-16 | 2.12140287 |
| FGFR1    | 2.90E-17 | 2.13010528 |
| MLLT1    | 3.90E-17 | 2.13327875 |
| FLJ20519 | 3.47E-17 | 2.14144062 |
| TREX2    | 6.52E-17 | 2.15015886 |
| SF3A1    | 1.30E-17 | 2.15124917 |
| RANBP3   | 1.56E-17 | 2.1554372  |
| BPI      | 8.72E-18 | 2.15679823 |
| Bit1     | 6.98E-16 | 2.16314246 |
| DSG3     | 3.16E-16 | 2.17504474 |
| GP1BA    | 1.23E-17 | 2.1772155  |
| AAK1     | 2.15E-17 | 2.17968305 |
| PLA2G5   | 1.06E-16 | 2.18216005 |
| ARHGDIA  | 4.35E-16 | 2.18290977 |
| FLJ10874 | 8.42E-18 | 2.18782214 |
| GRIN2D   | 1.19E-16 | 2.19029009 |
| HNF4G    | 8.54E-17 | 2.19412655 |
| SF3B4    | 8.85E-18 | 2.19591995 |
| HNRPH3   | 4.82E-17 | 2.1989628  |
| IRAK2    | 5.49E-17 | 2.20266286 |

|          |          |            |
|----------|----------|------------|
| LILRB3   | 3.78E-16 | 2.21368532 |
| CRYBB1   | 9.47E-18 | 2.22003865 |
| SLC22A8  | 5.68E-17 | 2.22295982 |
| RNF110   | 1.62E-16 | 2.22509986 |
| LGALS3BP | 6.50E-17 | 2.22524507 |
| ITGBL1   | 3.17E-17 | 2.22706588 |
| PLD2     | 4.81E-17 | 2.22730753 |
| ITGB4BP  | 1.02E-16 | 2.24674944 |
| CDY      | 1.90E-17 | 2.24775691 |
| NBL1     | 7.79E-17 | 2.2534961  |
| FLJ11164 | 4.12E-17 | 2.25731766 |
| IKBKG    | 1.64E-16 | 2.26140621 |
| ECGF1    | 1.22E-17 | 2.26372536 |
| NKX2-8   | 8.30E-18 | 2.26810384 |
| ADMR     | 8.37E-16 | 2.2704886  |
| SDCBP2   | 8.32E-17 | 2.2794525  |
| FLJ10761 | 6.79E-17 | 2.28358939 |
| CGI-85   | 5.30E-17 | 2.2937176  |
| FLJ20331 | 1.52E-16 | 2.29574449 |
| MART2    | 1.89E-17 | 2.30513643 |
| FLJ10305 | 2.39E-17 | 2.30918829 |
| CDC20    | 2.08E-17 | 2.31728696 |
| PBX3     | 7.79E-17 | 2.33355605 |
| SOX8     | 2.64E-17 | 2.3335974  |
| CCDC6    | 4.47E-18 | 2.34715435 |
| SPIN2    | 1.32E-17 | 2.34884572 |
| FA2H     | 3.46E-17 | 2.35256617 |

|              |          |            |
|--------------|----------|------------|
| MAOB         | 1.60E-17 | 2.35806573 |
| LRP5         | 3.96E-17 | 2.36246394 |
| PIGN         | 9.88E-17 | 2.36982252 |
| CHST6        | 3.69E-19 | 2.3712318  |
| HSRG1        | 3.77E-18 | 2.37987054 |
| ATP5G1       | 8.63E-18 | 2.39460089 |
| HBD          | 7.94E-16 | 2.39876301 |
| GABRD        | 2.49E-17 | 2.40300176 |
| NR4A1        | 1.46E-17 | 2.40874381 |
| FLJ20359     | 2.08E-17 | 2.42151779 |
| PEF          | 4.52E-17 | 2.42572343 |
| SYNGR1       | 2.08E-16 | 2.43053541 |
| FPRL1        | 1.58E-17 | 2.43226863 |
| SMARCA3      | 4.84E-16 | 2.44454187 |
| TCAP         | 2.84E-17 | 2.44922815 |
| OPTC         | 2.47E-17 | 2.46184292 |
| GATM         | 2.38E-16 | 2.46431929 |
| TLX3         | 2.72E-17 | 2.47027566 |
| DKFZP566B183 | 1.73E-17 | 2.4771584  |
| GPR44        | 1.44E-16 | 2.47725496 |
| MYO5A        | 7.60E-17 | 2.47768658 |
| ZNF426       | 9.16E-17 | 2.4790135  |
| GRK6         | 1.84E-17 | 2.48850782 |
| GYS1         | 2.16E-17 | 2.49107765 |
| DPF2         | 3.85E-17 | 2.49343171 |
| FBXL8        | 2.97E-17 | 2.49740084 |
| ZCWCC2       | 2.50E-17 | 2.49991591 |

|          |          |            |
|----------|----------|------------|
| SYN1     | 8.93E-18 | 2.5064294  |
| TIMM17A  | 9.38E-17 | 2.5066203  |
| JARID1B  | 4.60E-17 | 2.50929963 |
| WDR8     | 2.90E-16 | 2.51059502 |
| MC1R     | 3.50E-17 | 2.5289621  |
| MAGEB4   | 2.10E-17 | 2.55214565 |
| MAP1A    | 9.06E-18 | 2.58212247 |
| FEZ1     | 1.07E-17 | 2.60210037 |
| CRHR2    | 9.03E-19 | 2.60253496 |
| DIO3     | 4.84E-17 | 2.60619543 |
| HS3ST3A1 | 1.74E-17 | 2.6108714  |
| E2F4     | 5.65E-18 | 2.62300577 |
| GORASP2  | 1.74E-17 | 2.6345349  |
| FLJ11856 | 5.95E-18 | 2.63524616 |
| KIAA0040 | 9.92E-18 | 2.639522   |
| MAN2A2   | 1.87E-16 | 2.65355333 |
| PAK1     | 2.20E-17 | 2.66211713 |
| FOS      | 2.36E-17 | 2.66648467 |
| KRTHA2   | 3.32E-17 | 2.67514935 |
| XCR1     | 7.59E-17 | 2.68312598 |
| GDF1     | 4.80E-18 | 2.68956973 |
| TNFSF7   | 1.70E-17 | 2.69378577 |
| GARP     | 3.75E-18 | 2.70260486 |
| ARAP3    | 3.93E-18 | 2.71335259 |
| GPR135   | 1.18E-16 | 2.7168394  |
| PYCR1    | 4.28E-18 | 2.72371626 |
| PDHA1    | 2.24E-17 | 2.72599082 |

|        |          |            |
|--------|----------|------------|
| KRTHA1 | 1.56E-16 | 2.73587651 |
| FOXK2  | 3.40E-16 | 2.75202094 |
| CTAG1B | 1.12E-17 | 2.75339909 |
| UBQLN3 | 1.03E-17 | 2.75681438 |
| CDH1   | 4.53E-19 | 2.78915411 |
| KLF8   | 8.94E-18 | 2.79814367 |
| TOP2B  | 5.78E-18 | 2.81616414 |
| CLDN12 | 7.94E-18 | 2.82692979 |
| PHF1   | 3.53E-17 | 2.8290569  |
| SOX10  | 2.92E-18 | 2.85855242 |
| GMEB2  | 6.97E-17 | 2.86764371 |
| ALG3   | 1.57E-17 | 2.87291486 |
| MICAL2 | 9.61E-18 | 2.89161726 |
| BCKDK  | 7.98E-17 | 2.90185755 |
| MFNG   | 5.09E-17 | 2.92891435 |
| USP1   | 2.68E-17 | 2.96199776 |
| LIPE   | 7.31E-17 | 2.96314113 |
| NR4A3  | 3.19E-17 | 2.96741497 |
| DAB2   | 1.56E-18 | 2.98430045 |
| EFNA3  | 1.96E-18 | 2.98458127 |
| CRA    | 5.77E-18 | 2.99405993 |
| PPY2   | 3.11E-18 | 3.00937552 |
| DVL2   | 2.56E-18 | 3.01039684 |
| NAG18  | 1.39E-18 | 3.01538105 |
| EIF3S4 | 3.13E-18 | 3.04396438 |
| pp9099 | 3.90E-18 | 3.05822593 |
| POU5F1 | 6.80E-18 | 3.07652475 |

|          |          |            |
|----------|----------|------------|
| DLL3     | 7.53E-18 | 3.10711227 |
| FLII     | 6.67E-17 | 3.13931391 |
| RNF5     | 2.15E-18 | 3.14182047 |
| GREM1    | 4.05E-18 | 3.15924058 |
| IL17R    | 5.02E-17 | 3.1688108  |
| GPR56    | 4.37E-17 | 3.18687796 |
| ARSA     | 7.43E-17 | 3.20345866 |
| FLJ11286 | 3.30E-18 | 3.21216492 |
| ABHD4    | 1.24E-17 | 3.21665694 |
| MGC3047  | 3.95E-18 | 3.23020528 |
| STAT1    | 8.81E-18 | 3.23085491 |
| GNRH2    | 5.03E-18 | 3.24451131 |
| EFNA4    | 7.67E-18 | 3.26129129 |
| MCOLN1   | 6.49E-17 | 3.26279844 |
| ADRA1D   | 2.46E-18 | 3.26781575 |
| SERF1A   | 2.03E-17 | 3.28629473 |
| ZNFN1A5  | 1.95E-18 | 3.31234549 |
| AQP5     | 7.30E-18 | 3.33982686 |
| NDP      | 2.25E-18 | 3.3410905  |
| HOXD4    | 1.28E-18 | 3.3584878  |
| SIAT8E   | 9.65E-18 | 3.36930581 |
| APOM     | 5.08E-18 | 3.3699619  |
| OAS1     | 8.75E-19 | 3.40979339 |
| FXD3     | 4.07E-18 | 3.45265673 |
| KRTHA5   | 1.08E-17 | 3.46552511 |
| PRSS8    | 9.11E-18 | 3.50206126 |
| FLJ20249 | 1.83E-17 | 3.51299099 |

|         |          |            |
|---------|----------|------------|
| GPS2    | 9.22E-18 | 3.60133074 |
| SSTR3   | 4.21E-18 | 3.6416582  |
| TESK1   | 2.19E-18 | 3.66237453 |
| KIF3B   | 2.28E-18 | 3.69072198 |
| EDG5    | 4.31E-18 | 3.72560629 |
| UTF1    | 7.90E-20 | 3.73044959 |
| GPR3    | 1.35E-18 | 3.7426546  |
| ARHGAP8 | 3.28E-18 | 3.74287319 |
| ENTPD1  | 1.29E-18 | 3.90427326 |
| SLC6A3  | 5.49E-19 | 3.94245919 |
| DLGAP1  | 7.02E-18 | 4.09086984 |
| AP1G2   | 4.17E-18 | 4.21903218 |
| NKG7    | 9.20E-19 | 4.37589591 |

| Supplementary table 2. Enrichment criteria of conventional ameloblastoma |         |               |                 |                                                               |                                                                                                                       |                                                                                                                                                                          |
|--------------------------------------------------------------------------|---------|---------------|-----------------|---------------------------------------------------------------|-----------------------------------------------------------------------------------------------------------------------|--------------------------------------------------------------------------------------------------------------------------------------------------------------------------|
| Enrichment FDR                                                           | n Genes | Pathway Genes | Fold Enrichment | Pathway                                                       | URL                                                                                                                   | Genes                                                                                                                                                                    |
| <b>0.00132964</b>                                                        | 30      | 1264          | 2.77458617      | Positive regulation of transcription by RNA polymerase II     | <a href="http://amigo.geneontology.org/amigo/term/GO:0045944">http://amigo.geneontology.org/amigo/term/GO:0045944</a> | DVL2 SOX8 SUPT16H SOX10 GMEB2 ELF4 HLF STAT1 NR4A3 NR4A1 MICAL2 DPF2 NKX2-8 FOXK2 MTA2 DRD3 DAB2 LRP5 HNF4G PBX3 HOXD4 FOS UTF1 CTAG1B E2F4 POU5F1 MC1R IKBKG GREM1 GPS2 |
| <b>0.01416068</b>                                                        | 3       | 6             | 58.4512821      | Response to corticotropin-releasing hormone                   | <a href="http://amigo.geneontology.org/amigo/term/GO:0043435">http://amigo.geneontology.org/amigo/term/GO:0043435</a> | CRHR2 NR4A3 NR4A1                                                                                                                                                        |
| <b>0.01416068</b>                                                        | 3       | 6             | 58.4512821      | Cellular response to corticotropin-releasing hormone stimulus | <a href="http://amigo.geneontology.org/amigo/term/GO:0071376">http://amigo.geneontology.org/amigo/term/GO:0071376</a> | CRHR2 NR4A3 NR4A1                                                                                                                                                        |
| <b>0.01423179</b>                                                        | 32      | 1716          | 2.1800012       | Positive regulation of transcription, DNA-templated           | <a href="http://amigo.geneontology.org/amigo/term/GO:0045893">http://amigo.geneontology.org/amigo/term/GO:0045893</a> | DVL2 SOX8 CDH1 SUPT16H SOX10 GMEB2 ELF4 HLF STAT1 NR4A3 NR4A1 NDP MICAL2 DPF2 NKX2-8 FOXK2 MTA2 DRD3 DAB2 LRP5 HNF4G PBX3                                                |

|                   |    |      |            |                                                                       |                                                                                                                       |                                                                                                                                                                                                               |
|-------------------|----|------|------------|-----------------------------------------------------------------------|-----------------------------------------------------------------------------------------------------------------------|---------------------------------------------------------------------------------------------------------------------------------------------------------------------------------------------------------------|
|                   |    |      |            |                                                                       |                                                                                                                       | HOXD4 FOS UTF1 CTAG1B E2F4 POU5F1 MC1R<br>IKBK G REM1 GPS2                                                                                                                                                    |
| <b>0.01423179</b> | 32 | 1717 | 2.17873154 | Positive regulation<br>of RNA biosynthetic<br>process                 | <a href="http://amigo.geneontology.org/amigo/term/GO:1902680">http://amigo.geneontology.org/amigo/term/GO:1902680</a> | DVL2 SOX8 CDH1 SUPT16H SOX10 GMEB2 ELF4<br>HLF STAT1 NR4A3 NR4A1 NDP MICAL2 DP2 NKX2-<br>8 FOXK2 MTA2 DRD3 DAB2 LRP5 HNF4G PBX3<br>HOXD4 FOS UTF1 CTAG1B E2F4 POU5F1 MC1R<br>IKBK G REM1 GPS2                 |
| <b>0.01423179</b> | 32 | 1716 | 2.1800012  | Positive regulation<br>of nucleic acid-<br>templated<br>transcription | <a href="http://amigo.geneontology.org/amigo/term/GO:1903508">http://amigo.geneontology.org/amigo/term/GO:1903508</a> | DVL2 SOX8 CDH1 SUPT16H SOX10 GMEB2 ELF4<br>HLF STAT1 NR4A3 NR4A1 NDP MICAL2 DP2 NKX2-<br>8 FOXK2 MTA2 DRD3 DAB2 LRP5 HNF4G PBX3<br>HOXD4 FOS UTF1 CTAG1B E2F4 POU5F1 MC1R<br>IKBK G REM1 GPS2                 |
| <b>0.01429234</b> | 34 | 1895 | 2.09746025 | Positive regulation<br>of RNA metabolic<br>process                    | <a href="http://amigo.geneontology.org/amigo/term/GO:0051254">http://amigo.geneontology.org/amigo/term/GO:0051254</a> | DVL2 SOX8 CDH1 SUPT16H SOX10 GMEB2 ELF4<br>HLF STAT1 NR4A3 NR4A1 NDP MICAL2 DP2 NKX2-<br>8 FOXK2 SF3B4 MTA2 DRD3 DAB2 LRP5 HNF4G<br>PBX3 HOXD4 FOS UTF1 CTAG1B EIF4ENIF1 E2F4<br>POU5F1 MC1R IKBK G REM1 GPS2 |
| <b>0.0167191</b>  | 32 | 1757 | 2.12913037 | Neurogenesis                                                          | <a href="http://amigo.geneontology.org/amigo/term/GO:0022008">http://amigo.geneontology.org/amigo/term/GO:0022008</a> | DVL2 SOX8 SYN1 CDH1 HMG20B TOP2B FGFR1<br>DLL3 SOX10 FA2H STK25 CDC20 DNMT3A PLXNC1<br>NKX2-8 ARHGDIA EFNA3 PAK1 FEZ1 PTPRO DRD3<br>NRG1 NBL1 TLX3 YWHAZ MAP1A PBX3 FPR2<br>EIF4ENIF1 DIO3 ADGRG1 EFNA4       |
| <b>0.02074168</b> | 30 | 1624 | 2.15953013 | Generation of<br>neurons                                              | <a href="http://amigo.geneontology.org/amigo/term/GO:0048699">http://amigo.geneontology.org/amigo/term/GO:0048699</a> | DVL2 SOX8 SYN1 CDH1 HMG20B TOP2B FGFR1<br>DLL3 SOX10 STK25 CDC20 DNMT3A PLXNC1 NKX2-8<br>ARHGDIA EFNA3 PAK1 FEZ1 PTPRO DRD3 NRG1<br>NBL1 TLX3 YWHAZ MAP1A PBX3 EIF4ENIF1 DIO3<br>ADGRG1 EFNA4                 |
| <b>0.0457034</b>  | 32 | 1885 | 1.98455281 | Cell-cell signaling                                                   | <a href="http://amigo.geneontology.org/amigo/term/GO:0007267">http://amigo.geneontology.org/amigo/term/GO:0007267</a> | DVL2 SYN1 CDH1 MAOB SOX10 SYNGR1 NTSR1<br>GRIN2D CRHR2 CDC20 NDP PSMB2 SYT5 EFNA3<br>PTPRO DRD3 DAB2 NRG1 LRP5 FABP5 MAP1A<br>DLGAP1 ADRA1D GABRD GRK6 ADGRG1 POU5F1<br>EFNA4 S1PR2 G REM1 SLC6A3 SSTR3       |
| <b>0.0457034</b>  | 33 | 1970 | 1.9582663  | Positive regulation<br>of macromolecule<br>biosynthetic process       | <a href="http://amigo.geneontology.org/amigo/term/GO:0010557">http://amigo.geneontology.org/amigo/term/GO:0010557</a> | DVL2 SOX8 CDH1 SUPT16H SOX10 GMEB2 ELF4<br>HLF STAT1 NR4A3 NR4A1 NDP MICAL2 DP2 NKX2-<br>8 FOXK2 MTA2 DRD3 DAB2 LRP5 HNF4G PBX3<br>UPF3A HOXD4 FOS UTF1 CTAG1B E2F4 POU5F1<br>MC1R IKBK G REM1 GPS2           |
| <b>0.05149687</b> | 13 | 460  | 3.30376812 | Pattern specification<br>process                                      | <a href="http://amigo.geneontology.org/amigo/term/GO:0007389">http://amigo.geneontology.org/amigo/term/GO:0007389</a> | DVL2 DLL3 MFNG KIF3B MICAL2 NBL1 LRP5 PBX3<br>HOXD4 TCAP ADGRG1 POU5F1 G REM1                                                                                                                                 |
| <b>0.05823235</b> | 9  | 243  | 4.3297246  | Adenylate cyclase-<br>modulating G<br>protein-coupled                 | <a href="http://amigo.geneontology.org/amigo/term/GO:0007188">http://amigo.geneontology.org/amigo/term/GO:0007188</a> | CRHR2 DRD3 MC4R FPR2 ADRA1D GPR3 ADGRG1<br>MC1R S1PR2                                                                                                                                                         |

|                   |    |      |            |                                                                           |                                                                                                                       |                                                                                                                                                                       |
|-------------------|----|------|------------|---------------------------------------------------------------------------|-----------------------------------------------------------------------------------------------------------------------|-----------------------------------------------------------------------------------------------------------------------------------------------------------------------|
|                   |    |      |            | receptor signaling pathway                                                |                                                                                                                       |                                                                                                                                                                       |
| <b>0.05823235</b> | 15 | 606  | 2.89362782 | Regulation of system process                                              | <a href="http://amigo.geneontology.org/amigo/term/GO:0044057">http://amigo.geneontology.org/amigo/term/GO:0044057</a> | FXYD3 SOX10 NTSR1 GRIN2D NR4A3 PAK1 PTPRO DRD3 TLX3 FABP5 PBX3 KCNJ4 DLGAP1 ADRA1D S1PR2                                                                              |
| <b>0.05823235</b> | 19 | 897  | 2.47619701 | Positive regulation of cell differentiation                               | <a href="http://amigo.geneontology.org/amigo/term/GO:0045597">http://amigo.geneontology.org/amigo/term/GO:0045597</a> | SOX8 HMG20B FGFR1 SOX10 TESK1 STAT1 STK25 PLA2G5 PLXNC1 ARHGDIA PAK1 FEZ1 DAB2 NRG1 NBL1 LRP5 FOS S1PR2 GREM1                                                         |
| <b>0.05823235</b> | 2  | 3    | 77.9350427 | Norrin signaling pathway                                                  | <a href="http://amigo.geneontology.org/amigo/term/GO:0110135">http://amigo.geneontology.org/amigo/term/GO:0110135</a> | NDP LRP5                                                                                                                                                              |
| <b>0.05919308</b> | 7  | 149  | 5.49206677 | Adenylate cyclase-activating G protein-coupled receptor signaling pathway | <a href="http://amigo.geneontology.org/amigo/term/GO:0007189">http://amigo.geneontology.org/amigo/term/GO:0007189</a> | DRD3 MC4R ADRA1D GPR3 ADGRG1 MC1R S1PR2                                                                                                                               |
| <b>0.05919308</b> | 5  | 68   | 8.59577677 | Skeletal muscle cell differentiation                                      | <a href="http://amigo.geneontology.org/amigo/term/GO:0035914">http://amigo.geneontology.org/amigo/term/GO:0035914</a> | SOX8 HMG20B HLF NR4A1 FOS                                                                                                                                             |
| <b>0.06600716</b> | 26 | 1473 | 2.06345327 | Neuron differentiation                                                    | <a href="http://amigo.geneontology.org/amigo/term/GO:0030182">http://amigo.geneontology.org/amigo/term/GO:0030182</a> | DVL2 SOX8 SYN1 CDH1 HMG20B TOP2B FGFR1 STK25 CDC20 DNMT3A PLXNC1 NKX2-8 ARHGDIA EFNA3 PAK1 FEZ1 PTPRO NRG1 NBL1 TLX3 YWHAZ MAP1A PBX3 EIF4ENIF1 DIO3 EFNA4            |
| <b>0.07222863</b> | 2  | 4    | 58.4512821 | Compartment pattern specification                                         | <a href="http://amigo.geneontology.org/amigo/term/GO:0007386">http://amigo.geneontology.org/amigo/term/GO:0007386</a> | DLL3 PBX3                                                                                                                                                             |
| <b>0.07222863</b> | 2  | 4    | 58.4512821 | Golgi reassembly                                                          | <a href="http://amigo.geneontology.org/amigo/term/GO:0090168">http://amigo.geneontology.org/amigo/term/GO:0090168</a> | STK25 YWHAZ                                                                                                                                                           |
| <b>0.11965066</b> | 29 | 1982 | 1.82844576 | Locomotion                                                                | <a href="http://amigo.geneontology.org/amigo/term/GO:0040011">http://amigo.geneontology.org/amigo/term/GO:0040011</a> | SOX8 CDH1 TOP2B FGFR1 SOX10 TESK1 DUSP3 NR4A3 NR4A1 PLD2 PLXNC1 EFNA3 PAK1 MTA2 FEZ1 PTPRO DRD3 PSTPIP2 DAB2 NBL1 LRP5 TLX3 FPR2 XCR1 ITGBL1 ADGRG1 EFNA4 S1PR2 GREM1 |
| <b>0.12320477</b> | 3  | 22   | 15.9412587 | Postsynaptic neurotransmitter receptor internalization                    | <a href="http://amigo.geneontology.org/amigo/term/GO:0098884">http://amigo.geneontology.org/amigo/term/GO:0098884</a> | DRD3 NRG1 MX2                                                                                                                                                         |
| <b>0.12320477</b> | 3  | 22   | 15.9412587 | Postsynaptic endocytosis                                                  | <a href="http://amigo.geneontology.org/amigo/term/GO:0140239">http://amigo.geneontology.org/amigo/term/GO:0140239</a> | DRD3 NRG1 MX2                                                                                                                                                         |
| <b>0.12433392</b> | 28 | 1738 | 1.88335546 | Regulation of cell differentiation                                        | <a href="http://amigo.geneontology.org/amigo/term/GO:0045595">http://amigo.geneontology.org/amigo/term/GO:0045595</a> | SOX8 HMG20B FGFR1 DLL3 SOX10 TESK1 STAT1 STK25 NR4A3 PSMB2 PLA2G5 DPF2 PLXNC1 ARHGDIA PAK1 FEZ1 DRD3 DAB2 NRG1 NBL1 LRP5 TLX3 FOS EIF4ENIF1 GP1BA S1PR2 GREM1 GPS2    |

|                   |    |      |            |                                                    |                                                                                                                       |                                                                                                                                            |
|-------------------|----|------|------------|----------------------------------------------------|-----------------------------------------------------------------------------------------------------------------------|--------------------------------------------------------------------------------------------------------------------------------------------|
| <b>0.12515295</b> | 10 | 352  | 3.32109557 | Regionalization                                    | <a href="http://amigo.geneontology.org/amigo/term/GO:0003002">http://amigo.geneontology.org/amigo/term/GO:0003002</a> | DVL2 DLL3 NBL1 LRP5 PBX3 HOXD4 TCAP ADGRG1 POU5F1 GREM1                                                                                    |
| <b>0.12515295</b> | 3  | 23   | 15.2481605 | Regulation of respiratory gaseous exchange         | <a href="http://amigo.geneontology.org/amigo/term/GO:0043576">http://amigo.geneontology.org/amigo/term/GO:0043576</a> | NTSR1 TLX3 PBX3                                                                                                                            |
| <b>0.13878656</b> | 24 | 1590 | 1.91161426 | Cell migration                                     | <a href="http://amigo.geneontology.org/amigo/term/GO:0016477">http://amigo.geneontology.org/amigo/term/GO:0016477</a> | SOX8 CDH1 TOP2B FGFR1 SOX10 TESK1 DUSP3 NR4A3 NR4A1 PLXNC1 PAK1 MTA2 PTPRO PSTPIP2 DAB2 NBL1 LRP5 TLX3 FPR2 XCR1 ITGBL1 ADGRG1 S1PR2 GREM1 |
| <b>0.15727961</b> | 3  | 27   | 12.9891738 | DNA methylation-dependent heterochromatin assembly | <a href="http://amigo.geneontology.org/amigo/term/GO:0006346">http://amigo.geneontology.org/amigo/term/GO:0006346</a> | DNMT3A PPHLN1 POU5F1                                                                                                                       |
| <b>0.15727961</b> | 6  | 149  | 4.7074858  | Regulation of nervous system process               | <a href="http://amigo.geneontology.org/amigo/term/GO:0031644">http://amigo.geneontology.org/amigo/term/GO:0031644</a> | SOX10 NTSR1 GRIN2D FABP5 DLGAP1 S1PR2                                                                                                      |
| <b>0.15727961</b> | 3  | 26   | 13.4887574 | Regulation of osteoblast proliferation             | <a href="http://amigo.geneontology.org/amigo/term/GO:0033688">http://amigo.geneontology.org/amigo/term/GO:0033688</a> | SOX8 LRP5 GREM1                                                                                                                            |
| <b>0.15727961</b> | 3  | 26   | 13.4887574 | Cell death in response to hydrogen peroxide        | <a href="http://amigo.geneontology.org/amigo/term/GO:0036474">http://amigo.geneontology.org/amigo/term/GO:0036474</a> | STK25 NR4A3 PYCR1                                                                                                                          |
| <b>0.15727961</b> | 2  | 8    | 29.225641  | D-amino acid transport                             | <a href="http://amigo.geneontology.org/amigo/term/GO:0042940">http://amigo.geneontology.org/amigo/term/GO:0042940</a> | NTSR1 SFXN1                                                                                                                                |
| <b>0.15727961</b> | 7  | 197  | 4.15389822 | Regulation of neuron differentiation               | <a href="http://amigo.geneontology.org/amigo/term/GO:0045664">http://amigo.geneontology.org/amigo/term/GO:0045664</a> | SOX8 HMG20B FGFR1 FEZ1 NBL1 TLX3 EIF4ENIF1                                                                                                 |
| <b>0.15727961</b> | 5  | 102  | 5.73051785 | Oligodendrocyte differentiation                    | <a href="http://amigo.geneontology.org/amigo/term/GO:0048709">http://amigo.geneontology.org/amigo/term/GO:0048709</a> | SOX8 SOX10 FA2H DRD3 NRG1                                                                                                                  |
| <b>0.15727961</b> | 23 | 1373 | 1.95830952 | Positive regulation of developmental process       | <a href="http://amigo.geneontology.org/amigo/term/GO:0051094">http://amigo.geneontology.org/amigo/term/GO:0051094</a> | DVL2 SOX8 HMG20B FGFR1 SOX10 TESK1 STAT1 STK25 CDC20 PLA2G5 PLXNC1 ARHGDIA PAK1 FEZ1 DAB2 NRG1 NBL1 LRP5 FOS DIO3 POU5F1 S1PR2 GREM1       |
| <b>0.15727961</b> | 9  | 324  | 3.24729345 | Negative regulation of cellular component movement | <a href="http://amigo.geneontology.org/amigo/term/GO:0051271">http://amigo.geneontology.org/amigo/term/GO:0051271</a> | CDH1 DUSP3 ARHGDIA PTPRO NRG1 NBL1 ADGRG1 S1PR2 GREM1                                                                                      |
| <b>0.15727961</b> | 2  | 8    | 29.225641  | Establishment of Golgi localization                | <a href="http://amigo.geneontology.org/amigo/term/GO:0051683">http://amigo.geneontology.org/amigo/term/GO:0051683</a> | STK25 YWHAZ                                                                                                                                |

|                   |    |      |            |                                                                                         |                                                                                                                       |                                                                                                                                                              |
|-------------------|----|------|------------|-----------------------------------------------------------------------------------------|-----------------------------------------------------------------------------------------------------------------------|--------------------------------------------------------------------------------------------------------------------------------------------------------------|
| <b>0.15727961</b> | 2  | 8    | 29.225641  | Negative regulation of monocyte chemotaxis                                              | <a href="http://amigo.geneontology.org/amigo/term/GO:0090027">http://amigo.geneontology.org/amigo/term/GO:0090027</a> | NBL1 GREM1                                                                                                                                                   |
| <b>0.15727961</b> | 16 | 815  | 2.29501966 | Synaptic signaling                                                                      | <a href="http://amigo.geneontology.org/amigo/term/GO:0099536">http://amigo.geneontology.org/amigo/term/GO:0099536</a> | SYN1 CDH1 SYNGR1 NTSR1 GRIN2D CRHR2 CDC20 SYT5 DRD3 NRG1 FABP5 MAP1A DLGAP1 GABRD S1PR2 SLC6A3                                                               |
| <b>0.15727961</b> | 3  | 29   | 12.0933687 | Neurotransmitter receptor internalization                                               | <a href="http://amigo.geneontology.org/amigo/term/GO:0099590">http://amigo.geneontology.org/amigo/term/GO:0099590</a> | DRD3 NRG1 MX2                                                                                                                                                |
| <b>0.15727961</b> | 2  | 8    | 29.225641  | Regulation of peptidyl-tyrosine autophosphorylation                                     | <a href="http://amigo.geneontology.org/amigo/term/GO:1900084">http://amigo.geneontology.org/amigo/term/GO:1900084</a> | NRG1 GREM1                                                                                                                                                   |
| <b>0.15727961</b> | 2  | 7    | 33.4007326 | Positive regulation of peptidyl-tyrosine autophosphorylation                            | <a href="http://amigo.geneontology.org/amigo/term/GO:1900086">http://amigo.geneontology.org/amigo/term/GO:1900086</a> | NRG1 GREM1                                                                                                                                                   |
| <b>0.15727961</b> | 2  | 8    | 29.225641  | Peptidyl-tyrosine dephosphorylation involved in inactivation of protein kinase activity | <a href="http://amigo.geneontology.org/amigo/term/GO:1990264">http://amigo.geneontology.org/amigo/term/GO:1990264</a> | DUSP3 PTPRO                                                                                                                                                  |
| <b>0.18125483</b> | 3  | 31   | 11.3131514 | Cell proliferation                                                                      | <a href="http://amigo.geneontology.org/amigo/term/GO:0033687">http://amigo.geneontology.org/amigo/term/GO:0033687</a> | SOX8 LRP5 GREM1                                                                                                                                              |
| <b>0.1819118</b>  | 2  | 9    | 25.9783476 | Positive regulation of peroxisome proliferator activated receptor signaling pathway     | <a href="http://amigo.geneontology.org/amigo/term/GO:0035360">http://amigo.geneontology.org/amigo/term/GO:0035360</a> | FABP5 GPS2                                                                                                                                                   |
| <b>0.1819118</b>  | 26 | 1776 | 1.77723493 | Cell motility                                                                           | <a href="http://amigo.geneontology.org/amigo/term/GO:0048870">http://amigo.geneontology.org/amigo/term/GO:0048870</a> | SOX8 CDH1 TOP2B FGFR1 SOX10 TESK1 DUSP3 NR4A3 NR4A1 PLD2 PLXNC1 PAK1 MTA2 PTPRO PSTPIP2 DAB2 NBL1 LRP5 TLX3 FPR2 XCR1 ITGBL1 ADGRG1 S1PR2 GREM1 SLC6A3       |
| <b>0.1819118</b>  | 27 | 1776 | 1.77723493 | Localization of cell                                                                    | <a href="http://amigo.geneontology.org/amigo/term/GO:0051674">http://amigo.geneontology.org/amigo/term/GO:0051674</a> | SOX8 CDH1 TOP2B FGFR1 SOX10 TESK1 DUSP3 NR4A3 NR4A1 PLD2 PLXNC1 ARHGDIA PAK1 MTA2 PTPRO PSTPIP2 DAB2 NRG1 NBL1 LRP5 TLX3 FPR2 XCR1 ITGBL1 ADGRG1 S1PR2 GREM1 |
| <b>0.1819118</b>  | 11 | 471  | 2.7302085  | Regulation of trans-synaptic signaling                                                  | <a href="http://amigo.geneontology.org/amigo/term/GO:0099177">http://amigo.geneontology.org/amigo/term/GO:0099177</a> | SYN1 CDH1 SYNGR1 GRIN2D CRHR2 CDC20 DRD3 FABP5 MAP1A DLGAP1 S1PR2                                                                                            |

|                   |    |     |            |                                                    |                                                                                                                       |                                                                                           |
|-------------------|----|-----|------------|----------------------------------------------------|-----------------------------------------------------------------------------------------------------------------------|-------------------------------------------------------------------------------------------|
| <b>0.19293439</b> | 5  | 114 | 5.12730544 | Phenol-containing compound metabolic process       | <a href="http://amigo.geneontology.org/amigo/term/GO:0018958">http://amigo.geneontology.org/amigo/term/GO:0018958</a> | MAOB DRD3 CTSB DIO3 MC1R                                                                  |
| <b>0.19293439</b> | 2  | 10  | 23.3805128 | Sequestering of BMP from receptor via BMP binding  | <a href="http://amigo.geneontology.org/amigo/term/GO:0038098">http://amigo.geneontology.org/amigo/term/GO:0038098</a> | NBL1 GREM1                                                                                |
| <b>0.19293439</b> | 5  | 115 | 5.08272018 | Regulation of receptor-mediated endocytosis        | <a href="http://amigo.geneontology.org/amigo/term/GO:0048259">http://amigo.geneontology.org/amigo/term/GO:0048259</a> | AAK1 DRD3 DAB2 NRG1 GREM1                                                                 |
| <b>0.19293439</b> | 2  | 10  | 23.3805128 | Determination of dorsal identity                   | <a href="http://amigo.geneontology.org/amigo/term/GO:0048263">http://amigo.geneontology.org/amigo/term/GO:0048263</a> | NBL1 GREM1                                                                                |
| <b>0.19293439</b> | 3  | 34  | 10.3149321 | Arachidonic acid secretion                         | <a href="http://amigo.geneontology.org/amigo/term/GO:0050482">http://amigo.geneontology.org/amigo/term/GO:0050482</a> | NTSR1 PLA2G5 DRD3                                                                         |
| <b>0.19293439</b> | 4  | 69  | 6.77696024 | Negative regulation of chemotaxis                  | <a href="http://amigo.geneontology.org/amigo/term/GO:0050922">http://amigo.geneontology.org/amigo/term/GO:0050922</a> | DUSP3 PTPRO NBL1 GREM1                                                                    |
| <b>0.19293439</b> | 15 | 776 | 2.25971451 | Trans-synaptic signaling                           | <a href="http://amigo.geneontology.org/amigo/term/GO:0099537">http://amigo.geneontology.org/amigo/term/GO:0099537</a> | SYN1 CDH1 SYNGR1 NTSR1 GRIN2D CRHR2 CDC20 SYT5 DRD3 FABP5 MAP1A DLGAP1 GABRD S1PR2 SLC6A3 |
| <b>0.19293439</b> | 3  | 34  | 10.3149321 | Arachidonate transport                             | <a href="http://amigo.geneontology.org/amigo/term/GO:1903963">http://amigo.geneontology.org/amigo/term/GO:1903963</a> | NTSR1 PLA2G5 DRD3                                                                         |
| <b>0.19304155</b> | 4  | 71  | 6.58605995 | Respiratory gaseous exchange by respiratory system | <a href="http://amigo.geneontology.org/amigo/term/GO:0007585">http://amigo.geneontology.org/amigo/term/GO:0007585</a> | NTSR1 TLX3 YWHAZ PBX3                                                                     |
| <b>0.19304155</b> | 9  | 350 | 3.00606593 | Negative regulation of locomotion                  | <a href="http://amigo.geneontology.org/amigo/term/GO:0040013">http://amigo.geneontology.org/amigo/term/GO:0040013</a> | CDH1 DUSP3 ARHGDIA PTPRO NRG1 NBL1 ADGRG1 S1PR2 GREM1                                     |
| <b>0.19304155</b> | 3  | 35  | 10.0202198 | Regulation of monocyte chemotaxis                  | <a href="http://amigo.geneontology.org/amigo/term/GO:0090025">http://amigo.geneontology.org/amigo/term/GO:0090025</a> | NBL1 FPR2 GREM1                                                                           |
| <b>0.19423342</b> | 13 | 637 | 2.38576661 | Endocytosis                                        | <a href="http://amigo.geneontology.org/amigo/term/GO:0006897">http://amigo.geneontology.org/amigo/term/GO:0006897</a> | EPN3 LGALS3BP AAK1 PLA2G5 SYT5 DRD3 DAB2 NRG1 LRP5 FPR2 MX2 AP1G2 GREM1                   |
| <b>0.19423342</b> | 11 | 490 | 2.62434328 | Axonogenesis                                       | <a href="http://amigo.geneontology.org/amigo/term/GO:0007409">http://amigo.geneontology.org/amigo/term/GO:0007409</a> | TOP2B STK25 PLXNC1 NKX2-8 ARHGDIA EFNA3 PAK1 FEZ1 PTPRO MAP1A EFNA4                       |
